# Supplementary material
Source: publisher figshare collection journal article supplement (https://acs.figshare.com/ndownloader/files/23461040)
Supplement: Supplementary file 1 [file 23461040]

## **Exonuclease III-powered self-propelled DNA machine for distinctly amplified detection of nucleic acid and protein**

Shuang Liu, Xiaoxiao Yu, Jialong Wang, Dengren Liu, Li Wang, Shufeng Liu\*

Key Laboratory of Optic-electric Sensing and Analytical Chemistry for Life Science, Ministry of Education, College of Chemistry and Molecular Engineering, Qingdao University of Science and Technology, 53 Zhengzhou Road, Qingdao 266042, China.

\* Corresponding author. E-mail: [slu@qust.edu.cn](mailto:slu@qust.edu.cn)

### **Table of contents**

|                                                                                                                                                  |        |
|--------------------------------------------------------------------------------------------------------------------------------------------------|--------|
| Nucleic acid sequence (Table S1)-----                                                                                                            | S2     |
| Nucleic acid detection performance comparison (Table S2) -----                                                                                   | S3     |
| Thrombin detection performance comparison (Table S3)-----                                                                                        | S4     |
| Fluorescence spectra of H1 before and after annealing with BHQ-free H2 (Figure S1) -----                                                         | S5     |
| Optimization of Exo III and H1-H2 hybrid amount (Figure S2)-----                                                                                 | S6     |
| Schematic illustration; fluorescence spectra for TD2 detection; gel electrophoresis; fluorescence responses at different inputs (Figure S3)----- | S7     |
| Fluorescence spectra and gel electrophoresis of the sensing system of the H3-S1 hybrid (Figure S4)-----                                          | S8     |
| Gel electrophoresis for thrombin detection (Figure S5)-----                                                                                      | S9     |
| Schematic illustration; detection performance toward thrombin by the H3-S1 hybrid probe (Figure S6)-----                                         | S10    |
| Detection selectivity toward thrombin (Figure S7)-----                                                                                           | S11    |
| References -----                                                                                                                                 | S12-13 |

**Table S1.** The DNA sequences used in current study <sup>a</sup>

| Name             | Sequence (5' to 3')                                                                                 |
|------------------|-----------------------------------------------------------------------------------------------------|
| H1               | CGCATCTCTT(FAM)ACACGTGATCGAATGTTATTAATACCG<br>TAGTTGACCTATTCCC <b>GACCCT</b> AGAGAT <b>GCG</b>      |
| H2               | CAG <b>AGGGTC</b> GGGAATAGGTCAACTACGGTATTAATAACAT<br>TCGATCACGTGT(BHQ) <b>AAGAGATGACCCTCTG</b>      |
| BHQ-free H2      | CAG <b>AGGGTC</b> GGGAATAGGTCAACTACGGTATTAATAACAT<br>TCGATCACGTGTA <b>AGAGATGACCCTCTG</b>           |
| H3               | ATCTCTT(FAM)ACACGTGATCGAATGTTATTAATACCGTAG<br>TTGACCTATTCCC <b>GACCCT</b> AGAGAT <b>GCG</b>         |
| S1               | <b>AGGGTC</b> GGGAATAGGTCAACTACGGTATTAATAACATT <b>CTG</b><br>ATCACGTGT(BHQ) <b>AAGAGATCTGGGACTG</b> |
| H4               | TTTT <b>CGCATCTCT</b> ACCAACCACACCTTTTTTTTTTTTTTTTTT<br>TTTT <b>GGTTGGTGTGGTTGG</b> TAGAGATTTTTTT   |
| Target DNA (TD1) | <b>GACCACCGCATCTCTACATTCAA</b>                                                                      |
| 1MT              | <b>GACCACCGCATATCTACATTCAA</b>                                                                      |
| 2MT              | <b>GACCACCTCATCGCTACATTCAA</b>                                                                      |
| NC               | <b>GACCACATGGATCTAGTATTCAA</b>                                                                      |
| Target DNA (TD2) | <b>CAAGATCAGAGGGTCACTTAGAA</b>                                                                      |

<sup>a</sup> For H1, the green color represents the base sequences of domains c and c\* in Scheme 1; the violet color represents the base sequences of domains of d and d\*; the red color represents the base sequences of domain a; the blue color represents the base sequences of domain b. For H2, the dark yellow color represents the base sequences of domains e and e\*; the red color represents the base sequences of domains of a and a\*; the green color represents the base sequences of domain c; the blue color represents the base sequences of domain b\*. For H3, S1 and H4, different domains are also indicated with different colors, which are related with the schemes in Figure 3A and 4A. The H1-H2 hybrid probe was obtained by annealing H1 with H2. The H3-S1 hybrid probe was obtained by annealing H3 with S1. The H4 is for thrombin aptamer switch. Target DNA (TD1) could recognize with the 3'-protruding domain of H1 in H1-H2 hybrid probe or the 3'-protruding domain of H3 in H3-S1 hybrid probe. The 1MT and 2MT represents the one-base and two-bases mismatched DNA. The mismatched bases in contrast with target DNA (TD1) have been indicated with red color. The target DNA (TD2) could be recognized by 3'-protruding domain of H2 in H1-H2 hybrid probe. The recognition regions for TD1 and TD2 were indicated with green color.

**Table S2.** Comparison of detection performance for target DNA by current sensing system with those reported methods

| Ref.      | Detection range    | Detection limit | Strategy                                                                            |
|-----------|--------------------|-----------------|-------------------------------------------------------------------------------------|
| [1]       | 1 fM-0.1 nM        | 1 fM            | Target recycling and cascade circular exponential amplification                     |
| [2]       | 10 pM-0.15 $\mu$ M | 10 pM           | Palindromic molecular beacon-based intramolecular strand-displacement amplification |
| [3]       | 0.1 pM-200 nM      | 16 fM           | Target self-amplification-based DNA machine                                         |
| [4]       | 1 fM-100 fM        | 0.75 fM         | Exonuclease III-induced isothermal amplification                                    |
| [5]       | 100 fM-10 nM       | 21 fM           | Exonuclease III-assisted recycling and DNAzyme                                      |
| [6]       | 0.025 nM-500 nM    | 15 pM           | Exonuclease III-assisted upconversion resonance energy transfer                     |
| [7]       | 10 fM-1 nM         | 3 fM            | Exonuclease III-assisted multiple cycle amplification                               |
| This work | 0.5 fM-1 pM        | 0.1 fM          | Exonuclease III-powered self-propelled DNA amplification                            |

**Table S3.** Comparison of detection performance for thrombin by current sensing system with those reported methods

| Ref.      | Detection range | Detection limit | Strategy                                                                                      |
|-----------|-----------------|-----------------|-----------------------------------------------------------------------------------------------|
| [8]       | 0.28 nM-86 nM   | 30 pM           | Exonuclease I assisted target recycling and SYBR Green I                                      |
| [9]       | 0.1 pM-5 nM     | 23 fM           | Binding induced 3D-bipedal DNA walker and catalytic hairpin assembly                          |
| [10]      | 0.01 nM-50 nM   | 6.9 pM          | Aptamer structure switching and metal-ion dependent DNAzyme                                   |
| [11]      | 20 pM-200 pM    | 9.2 pM          | Hybridization chain reaction                                                                  |
| [12]      | 5 pM-1 nM       | 1 pM            | DNAzyme and entropy-driven amplification                                                      |
| [13]      | 0.1 pM-10 pM    | 56 fM           | electrochemical ratiometric method and DNA walker strategy                                    |
| [14]      | 7.5 fM-25 nM    | 2.2 fM          | Dual-aptamer biorecognition and mesoporous silica encapsulated with iron porphyrin            |
| [15]      | 20 pM-1 nM      | 8.3 pM          | Proximity recognition-dependent strand translocation strategy with catalytic hairpin assembly |
| This work | 5 fM-10 pM      | 5 fM            | Exonuclease III-powered self-propelled DNA amplification                                      |

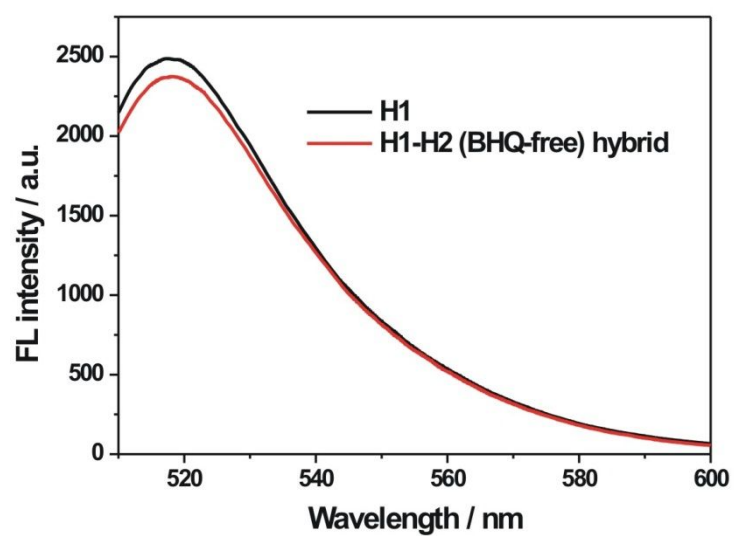

**Figure S1.** Fluorescence spectra recorded for H1 (200 nM) before and after annealing with 200 nM BHQ-free H2.

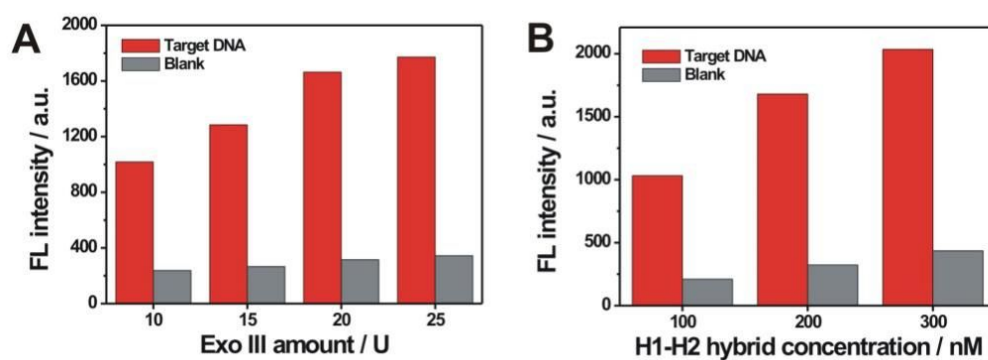

**Figure S2.** (A) Optimization of Exo III amount. Four different Exo III amounts (10, 15, 20 and 25 U) were used. (B) Optimization of H1-H2 hybrid concentration. Three different H1-H2 hybrid concentrations (100 nM, 200 nM and 300 nM) were studied. Target DNA concentration and reaction time was 0.1 pM and 60 min, respectively.

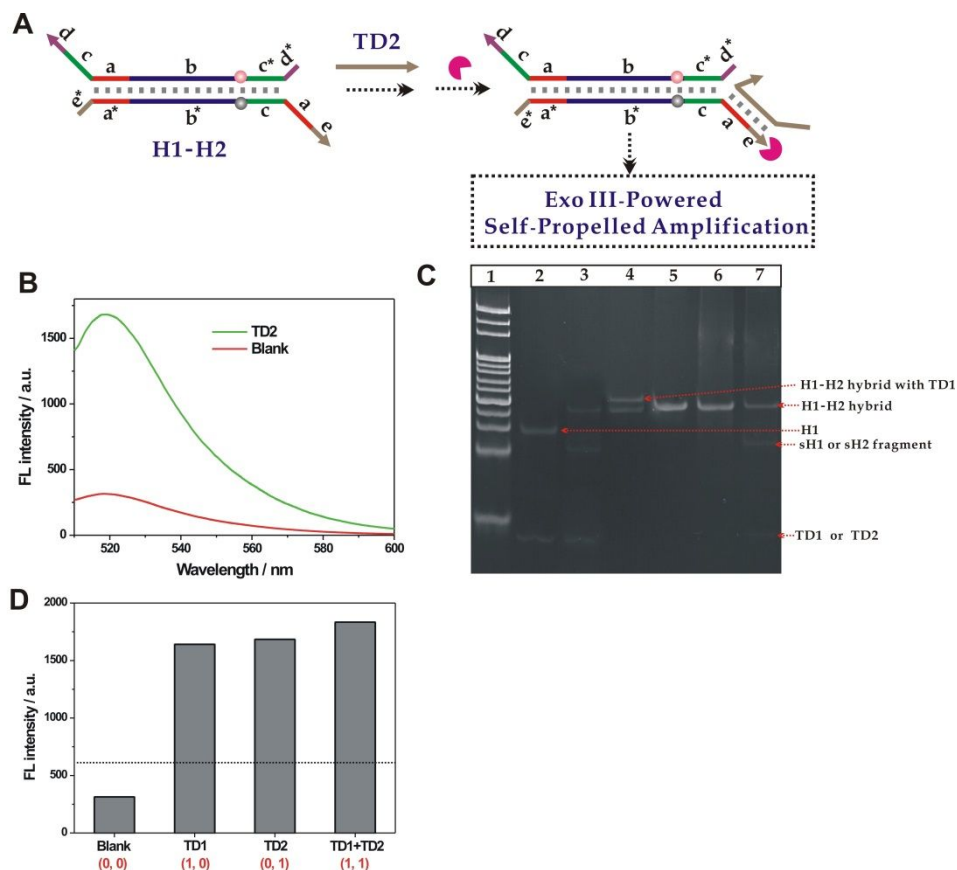

**Figure S3.** (A) Schematic illustration of the H1-H2 hybrid probe for the sensing of target DNA 2 (TD2). TD2 was recognized by the protruding 3'-domain of H2 in H1-H2 hybrid to trigger the successive Exo III-powered self-propelled DNA amplification process. (B) Fluorescence spectra of the sensing system in the presence and absence of 0.1 pM TD2. (C) Gel electrophoresis images: lane 1, DNA maker; lane 2, TD1 + H1; lane 3, TD1 + H1-H2 hybrid + Exo III; lane 4, TD1 + H1-H2 hybrid; lane 5, H1-H2 hybrid; lane 6, H1-H2 hybrid + Exo III; lane 7, TD2 + H1-H2 hybrid + Exo III. (D) Fluorescence responses of the sensing system by H1-H2 hybrid toward different inputs including no TD1 and TD2, TD1 only, TD2 only, and both TD1 and TD2. TD1 represents target DNA that could recognize with the protruding 3'-domain of H1 in H1-H2 hybrid. TD2 could recognize with the protruding 3'-domain of H2 in H1-H2 hybrid. The concentrations of TD1 and TD2 were both 0.1 pM.

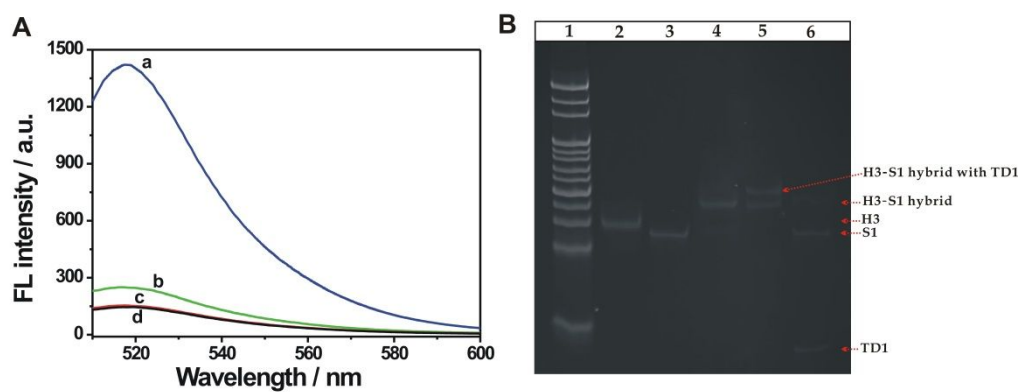

**Figure S4.** (A) Fluorescence spectra of the sensing system containing 200 nM H3-S1 hybrid probe and 20 U Exo III in the absence (b) and presence (a) of 0.1 nM target DNA. Control experiments are also conducted in the case of no Exo III (c), and no Exo III and target DNA (d), respectively. (B) Gel electrophoresis images: lane 1, DNA maker; lane 2, H3; lane 3, S1; lane 4, H3-S1 hybrid; lane 5, H3-S1 hybrid + TD1; lane 6, H3-S1 hybrid + TD1 + Exo III.



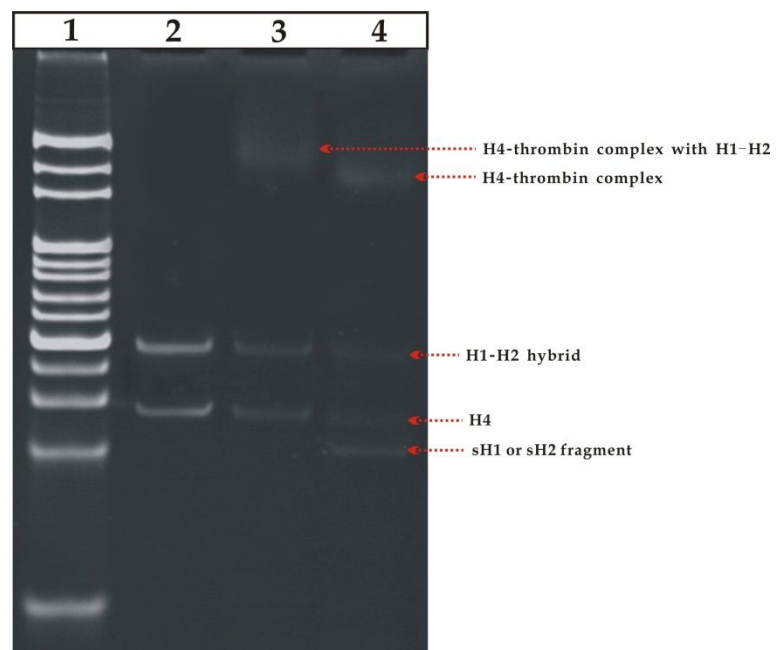

**Figure S5.** Gel electrophoresis images: lane 1, DNA maker; lane 2, H4 + H1-H2 hybrid; lane 3, H4 + H1-H2 hybrid + thrombin; lane 4, H4 + H1-H2 hybrid + thrombin + Exo III.

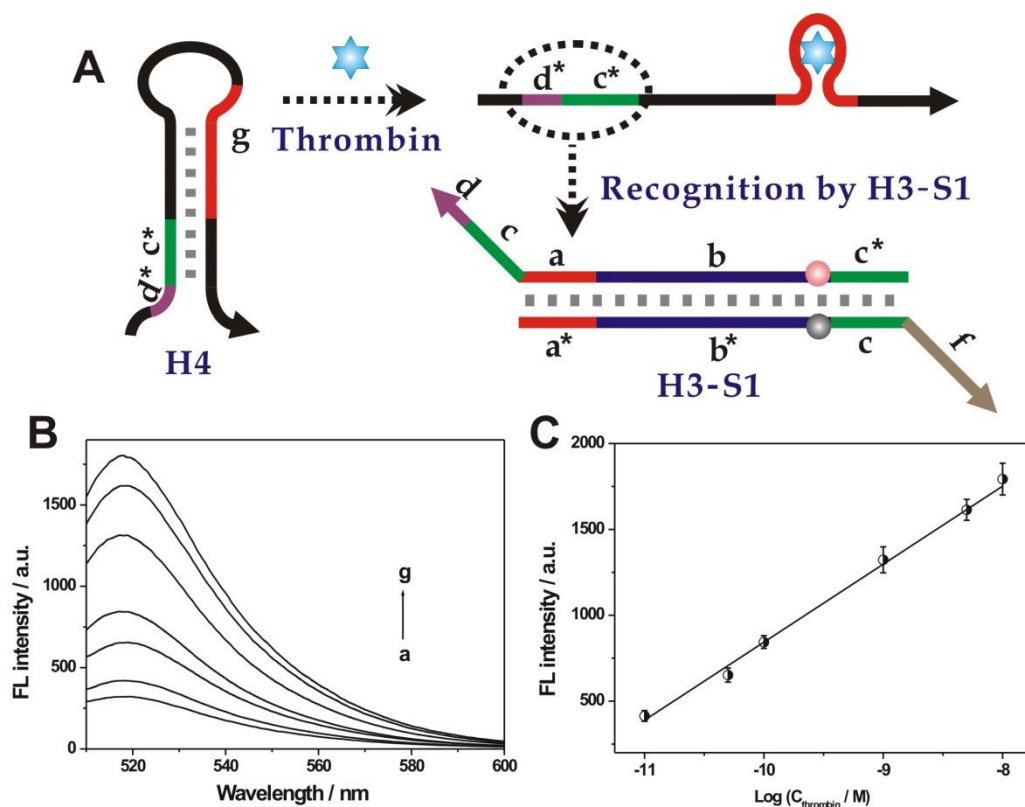

**Figure S6.** (A) Schematic illustration of thrombin detection by the sensing system of H3-S1 hybrid based on a typical Exo III-powered target recycling strategy. (B) Fluorescence spectra recorded at different concentrations of thrombin (from curves a to g: 0, 10 pM, 50 pM, 100 pM, 1 nM, 5 nM, and 10 nM, respectively). (C) Calibration curve for the fluorescence intensity vs thrombin concentration.

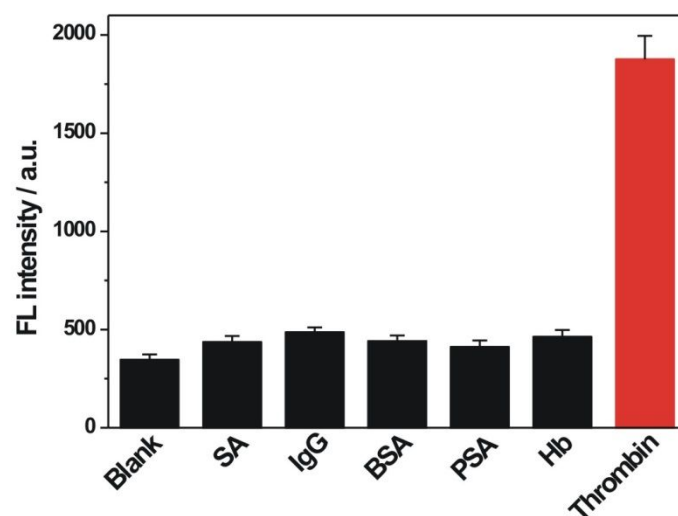

**Figure S7.** The selectivity of the sensing system (H1-H2 hybrid) toward thrombin and other non-specific proteins including streptavidin (SA), normal mouse immunoglobulin G (IgG), bovine serum albumin (BSA), prostate specific antigen (PSA), and Hemoglobin (Hb). These proteins have a same concentration of 10 pM.

## References

- [1] Sun, X.; Wang, L.; Zhao, M.; Zhao, C.; Liu, S. An Autocatalytic DNA Machine with Autonomous Target Recycling and Cascade Circular Exponential Amplification for One-Pot, Isothermal and Ultrasensitive Nucleic Acid Detection. *Chem. Commun.* **2016**, 52, 11108-11111.
- [2] Li, H.; Tang, Y.; Zhao, W.; Wu, Z.; Wang, S.; Yu, R. Palindromic Molecular Beacon-Based Intramolecular Strand-Displacement Amplification Strategy for Ultrasensitive Detection of K-ras Gene. *Anal. Chim. Acta* **2019**, 1065, 98-106.
- [3] Xu, H.; Jiang, Y.; Liu, D.; Liu, K.; Zhang, Y.; Yu, S.; Shen, Z.; Wu, Z. S. Twin Target Self-Amplification-Based DNA Machine for Highly Sensitive Detection of Cancer-Related Gene. *Anal. Chim. Acta* **2018**, 1011, 86-93.
- [4] Xue, Q.; Lv, Y.; Zhang, Y.; Xu, S.; Li, R.; Yue, Q.; Li, H.; Wang, L.; Gu, X.; Zhang, S.; Liu, J. Ultrasensitive Fluorescence Detection of Nucleic Acids Using Exonuclease III-Induced Cascade Two-Stage Isothermal Amplification-Mediated Zinc (II)-Protoporphyrin IX/G-Quadruplex Supramolecular Fluorescent Nanotags. *Biosens. Bioelectron.* **2014**, 61, 351-356.
- [5] Mu, Q.; Liu, G.; Yang, D.; Kou, X.; Cao, N.; Tang, Y.; Miao, P. Ultrasensitive Detection of DNA Based on Exonuclease III-Assisted Recycling Amplification and DNAzyme Motor. *Bioconjugate Chem.* **2018**, 29, 3527-3531.
- [6] Chen, Y.; Duong, H. T. T.; Wen, S.; Mi, C.; Zhou, Y.; Shimoni, O.; Valenzuela, S. M.; Jin, D. Exonuclease III-Assisted Upconversion Resonance Energy Transfer in a Wash-Free Suspension DNA Assay. *Anal. Chem.* **2018**, 90, 663-668.
- [7] Liu, W. J.; Xu, Q.; Ma, F.; Li, C. C.; Zhang, C. Y. Exonuclease III-Assisted Multiple Cycle Amplification for the Sensitive Detection of DNA with Zero Background Signal. *Analyst* **2018**, 143, 5461-5466.
- [8] Chen, X.; Li, T.; Tu, X.; Luo, L. Label-Free Fluorescent Aptasensor for Thrombin Detection Based on Exonuclease I Assisted Target Recycling and SYBR Green I Aided Signal Amplification. *Sensors and Actuators B* **2018**, 265, 98-103.
- [9] Xiong, E.; Zhen, D.; Jiang, L.; Zhou, X. Binding-Induced 3D-Bipedal DNA Walker for Cascade Signal Amplification Detection of Thrombin Combined with Catalytic Hairpin Assembly Strategy. *Anal. Chem.* **2019**, 91, 15317-15324.
- [10] Li, J.; Wang, S.; Jiang, B.; Xiang, Y.; Yuan, R. Target-Induced Structure Switching of Aptamers Facilitates Strand Displacement for DNAzyme Recycling Amplification Detection of Thrombin in Human Serum. *Analyst* **2019**, 144, 2430-2435.
- [11] Huang, Z.; He, D.; Li, H. W. A Fluorometric Assay of Thrombin Using Magnetic Nanoparticles and Enzyme-Free Hybridization Chain Reaction. *Microchim. Acta* **2020**, 187, 295.
- [12] Yun, W.; Li, N.; Wang, R.; Yang, L.; Chen, L.; Tang, Y. Proximity Ligation Assay Induced Hairpin to DNAzyme Structure Switching for Entropy-Driven Amplified Detection of Thrombin. *Anal. Chim. Acta* **2019**, 1064, 104-111.
- [13] Zhu, C.; Liu, M.; Li, X.; Zhang, X.; Chen, J. A New Electrochemical Aptasensor for Sensitive Assay of a Protein Based on the Dual-Signaling Electrochemical Ratiometric Method and DNA Walker Strategy. *Chem.*

*Commun.* **2018**, *54*, 10359-10362.

[14] Sun, Y.; Zhu, X.; Liu, H.; Dai, Y.; Han, R.; Gao, D.; Luo, C.; Wang, X.; Wei, Q. Novel Chemiluminescence Sensor for Thrombin Detection Based on Dual-Aptamer Biorecognition and Mesoporous Silica Encapsulated With Iron Porphyrin. *ACS Appl. Mater. Interfaces* **2020**, *12*, 5569-5577.

[15] Li, J.; Zhou, W.; Yuan, R.; Xiang, Y. Aptamer Proximity Recognition-Dependent Strand Translocation for Enzyme-Free and Amplified Fluorescent Detection of Thrombin via Catalytic Hairpin Assembly. *Anal. Chim. Acta* **2018**, *1038*, 126-131.
